# Supplementary material for: Assembling ionic liquids in MOF “Monomer” based membranes to trigger CO2/CH4 separation
Source: Royal Society of Chemistry journal article supplement (doi:10.1039/d2qm00802e), 2022-01-01
Supplement: d2qm00802e1.pdf [file d2qm00802e1.pdf]

## Supplementary Information

### Assembling Ionic Liquid in MOF “Monomer” based Membrane to Trigger CO<sub>2</sub>/CH<sub>4</sub> Separation

Xiaolei Cui<sup>a, &</sup>, Zixi Kang<sup>b, c, &,\*</sup>, Weidong Fan<sup>b</sup>, Jia Pang<sup>b</sup>, Yang Feng<sup>a</sup>, Caiyan Zhang<sup>b</sup>, Liting Yu<sup>b</sup>, Shuo Liu<sup>b</sup>, Xiuxian Tang<sup>b</sup>, Lili Fan<sup>b</sup>, Rongming Wang<sup>b</sup>, Daofeng Sun<sup>b,\*</sup>

<sup>a</sup> College of Chemical and Chemical Engineering, China University of Petroleum (East China), Qingdao, Shandong, 266580, PR China

<sup>b</sup> College of Science, School of Materials Science and Engineering, China University of Petroleum (East China), Qingdao, Shandong, 266580, PR China

<sup>c</sup> State Key Laboratory of Structural Chemistry, Fujian Institute of Research on the Structure of Matter, Chinese Academy of Sciences, Fuzhou, Fujian, 350002, PR China.

&These authors contributed equally to this work.

\*Corresponding authors. Email: [kzx@upc.edu.cn](mailto:kzx@upc.edu.cn); [dfsun@upc.edu.cn](mailto:dfsun@upc.edu.cn)

Electronic Supplementary Information (ESI) available: [details of any supplementary information available should be included here]. See DOI: 10.1039/x0xx00000x

## Supporting Figures and Tables

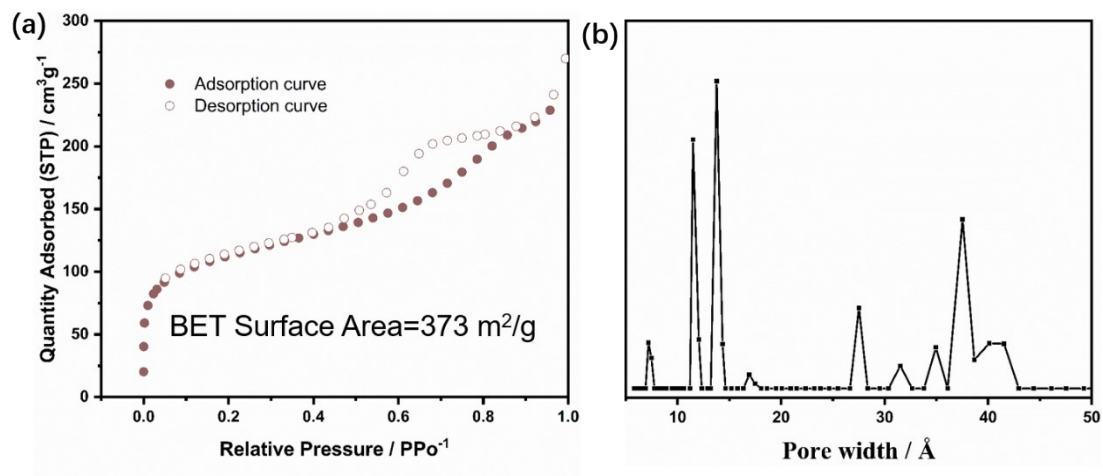

**Fig. S1.** (a) The  $\text{N}_2$  adsorption-desorption isotherms and BET surface area at 77 K for ultra-small UiO-66-NH<sub>2</sub>, (b) The pore size distribution of ultra-small UiO-66-NH<sub>2</sub>.

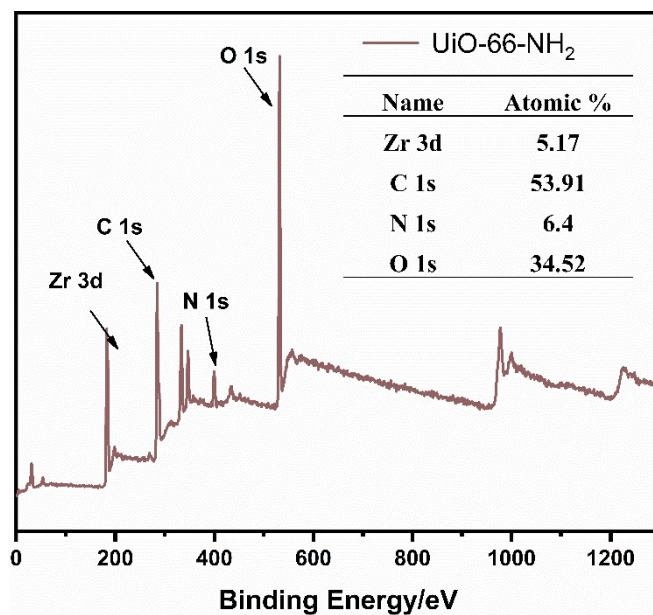

**Fig. S2.** The XPS results of UiO-66-NH<sub>2</sub>.

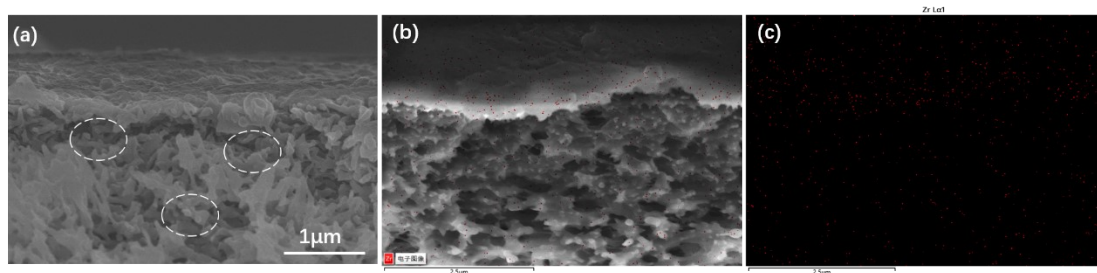

**Fig. S3.** (a) The cross-sectional SEM image of the UiO-66-NH<sub>2</sub>-TMC membrane; (b - c) The cross-sectional SEM and EDS Mapping images of the IL@UiO-66-NH<sub>2</sub>-TMC membrane.

**Table S1.** Mixed gas permeance and selectivity of PES substrate for CO<sub>2</sub> and CH<sub>4</sub> at 25 °C.

| Trans-membrane pressure drop | CO <sub>2</sub> permeance (GPU) | CH <sub>4</sub> permeance (GPU) | CO <sub>2</sub> /CH <sub>4</sub> selectivity |
|------------------------------|---------------------------------|---------------------------------|----------------------------------------------|
| 0.002 bar                    | 8635                            | 14572                           | 0.59                                         |

**Table S2.** Mixed gas permeance and selectivity of IL@UiO-66-NH<sub>2</sub>-TMC membrane for CO<sub>2</sub> and CH<sub>4</sub> at different temperatures.

| Trans-membrane pressure drop | Temperature (°C) | CO <sub>2</sub> permeance (GPU) | CH <sub>4</sub> permeance (GPU) | CO <sub>2</sub> /CH <sub>4</sub> selectivity |
|------------------------------|------------------|---------------------------------|---------------------------------|----------------------------------------------|
| 2 bar                        | 25               | 45±9                            | 1.4±0.4                         | 32.1±3                                       |
| 2 bar                        | 120              | 47±11                           | 1.5±0.5                         | 31±3.5                                       |

**Table S3.** Comparison between CO<sub>2</sub> separation performance of IL@UiO-66-NH<sub>2</sub>-TMC membrane and other reported membranes.

| Membrane                                | P <sub>CO<sub>2</sub></sub> (GPU) | CO <sub>2</sub> /CH <sub>4</sub> selective | References |
|-----------------------------------------|-----------------------------------|--------------------------------------------|------------|
| UiO-66                                  | 110.8                             | 9.3                                        | 1          |
| UiO-66-NH <sub>2</sub> /PA              | 27.1                              | 58.3                                       | 2          |
| UiO-66-NH <sub>2</sub> /Pebax/MPM       | 2.78                              | 33.7                                       | 3          |
| UiO-66                                  | 51                                | 26.9                                       | 4          |
| UiO-66-NH <sub>2</sub>                  | 36.9                              | 2.22                                       | 5          |
| UiO-66-NH <sub>2</sub> /PSF             | 50                                | 24                                         | 6          |
| PI-COOH/UiO-66                          | 130                               | 24.2                                       | 7          |
| UiO-66/Pebax                            | 9.3                               | 43                                         | 8          |
| UiO-66-NH <sub>2</sub> @MWCNT           | 0.166                             | 39.5                                       | 9          |
| UiO-66                                  | 49                                | 20                                         | 4          |
| UiO-66-6FDA-ODA                         | 5(50.4 barrer)                    | 45.8                                       | 10         |
| UiO-66-NH <sub>2</sub> -TMC             | 1090                              | 0.98                                       | This work  |
| IL@UiO-66-NH <sub>2</sub> -TMC (10 wt%) | 180                               | 5.7                                        | This work  |
| IL@UiO-66-NH <sub>2</sub> -TMC (15 wt%) | 47                                | 35                                         | This work  |
| IL@UiO-66-NH <sub>2</sub> -TMC (20 wt%) | 21.5                              | 75                                         | This work  |

## Reference

1. J. Yan, Y. Sun, T. Ji, L. Liu, Y. Liu, Cooperative defect tailoring: A promising protocol for exceeding performance limits of state-of-the-art MOF membranes, *J. Membr. Sci.*, DOI: 10.1016/j.memsci.2021.119515.
2. C. Jiao, X. Song, X. Zhang, L. Sun, H. Jiang, MOF-Mediated Interfacial Polymerization to Fabricate Polyamide Membranes with a Homogeneous Nanoscale Striped Turing Structure for CO<sub>2</sub>/CH<sub>4</sub> Separation, *ACS Appl. Mater. Interfaces*, 2021, **13**, 18380-18388.
3. M. Mozafari, R. Abedini, A. Rahimpour, Zr-MOFs-incorporated thin film nanocomposite Pebax 1657 membranes dip-coated on polymethylpentylene layer for efficient separation of CO<sub>2</sub>/CH<sub>4</sub>, *J. Mater. Chem. A*, 2018, **6**, 12380-12392.
4. J. Yan, Y. Sun, T. Ji, C. Zhang, L. Liu, Y. Liu, Room-temperature synthesis of defect-engineered Zirconium-MOF membrane enabling superior CO<sub>2</sub>/N<sub>2</sub> selectivity with zirconium-oxo cluster source, *J. Membr. Sci.*, DOI: 10.1016/j.seppur.2022.121315.
5. Y. Sun, C. Song, X. Guo, Y. Liu, Concurrent Manipulation of Out-of-Plane and Regional In-Plane Orientations of NH<sub>2</sub>-UiO-66 Membranes with Significantly Reduced Anisotropic Grain Boundary and Superior H<sub>2</sub>/CO<sub>2</sub> Separation Performance, *ACS Appl. Mater. Interfaces*, 2020, **12**, 4494–4500.
6. N. C. Su, D. T. Sun, C. M. Beavers, D. K. Britt, W. L. Queen, J. J. Urban, Enhanced Permeation Arising from Dual Transport Pathways in Hybrid Polymer-MOF Membranes. *Energy Environ. Sci*, 2016, **9**, 922-931.
7. S. Zhu, X. Bi, Y. Shi, Y. Shi, Y. Zhang, J. Jin, Z. Wang, Thin Films Based on Polyimide/Metal–Organic Framework Nanoparticle Composite Membranes with Substantially Improved Stability for CO<sub>2</sub>/CH<sub>4</sub> Separation, *ACS Appl. Nano Mater*, 2022, **5**, 8997–9007.
8. S.L. Javier, G.G. Ines, Z. Beatriz, T. Carlos, C. Joaquin, Thin supported MOF based mixed matrix membranes of Pebax®1657 for biogas upgrade, *New J. Chem*, 2019, **43**, 312.
9. J. Yan, Y. Sun, T. Ji, L. Liu, Y. Liu, Cooperative defect tailoring: A promising protocol for exceeding performance limits of state-of-the-art MOF membranes, *J. Membr. Sci.*, DOI: 10.1016/j.memsci.2021.119515.
10. O. G. Nik, X. Chen, S. Kaliaguine, Functionalized metal organic framework-polyimide mixed matrix membranes for CO<sub>2</sub>/CH<sub>4</sub> separation, *J. Membr. Sci.*, 2012, **15**, 48-61.
